# Supplementary material for: Measuring the Affordability of Nutritious Diets in Africa: Price Indexes for Diet Diversity and the Cost of Nutrient Adequacy
Source: PubMed Central journal article supplement (PMC7053386; doi:10.1093/ajae/aay059), 2018-08-13
Supplement: AJAE-2018-AJAE-AAY059-S1.pdf [file AJAE-2018-AJAE-AAY059-S1.pdf]

**Measuring the Affordability of Nutritious Diets in Africa:  
Price Indexes for Diet Diversity and the Cost of Nutrient Adequacy**

William A. Masters<sup>1,2</sup>, Yan Bai<sup>1</sup>, Anna Herforth<sup>1</sup>, Daniel Sarpong<sup>3</sup>,  
Fulgence Mishili<sup>4</sup>, Joyce Kinabo<sup>5</sup> and Jennifer C. Coates<sup>1</sup>

This version revised 20 June 2018

Author affiliations:

- <sup>1</sup> Friedman School of Nutrition Science & Policy, Tufts University, USA
- <sup>2</sup> Department of Economics, Tufts University, USA
- <sup>3</sup> Dept. of Agricultural Economics & Agribusiness, University of Ghana
- <sup>4</sup> Dept. of Agricultural Economics & Agribusiness, Sokoine University of Agriculture, Tanzania
- <sup>5</sup> Dept. of Food Technology, Nutrition & Consumer Sciences, Sokoine Univ. of Agric., Tanzania

Note:

This annex is supplemental information accompanying the AJAE article entitled "Measuring the Affordability of Nutritious Diets in Africa: Price Indexes for Diet Diversity and the Cost of Nutrient Adequacy". Data and model code for replication of results is available at our project website, <http://sites.tufts.edu/candasa>.

**Table A1. Descriptive Statistics of Monthly Food Prices per kg – Ghana (2011\$)**

| Food Groups                                          | No | Foodstuffs                | Obs. | Mean | Std. Dev. | CV   | Min  | Max   |
|------------------------------------------------------|----|---------------------------|------|------|-----------|------|------|-------|
| <b>Grains, white roots and tubers, and plantains</b> | 1  | Cassava                   | 70   | 0.53 | 0.11      | 0.20 | 0.36 | 0.76  |
|                                                      | 2  | Cocoyam                   | 70   | 1.19 | 0.27      | 0.23 | 0.79 | 1.82  |
|                                                      | 3  | Kokonte                   | 70   | 1.27 | 0.21      | 0.17 | 0.90 | 1.81  |
|                                                      | 4  | Gari                      | 70   | 1.47 | 0.25      | 0.17 | 1.15 | 2.41  |
|                                                      | 5  | Imported Rice             | 70   | 2.68 | 0.42      | 0.16 | 2.19 | 3.98  |
|                                                      | 6  | Local Rice                | 70   | 1.86 | 0.22      | 0.12 | 1.51 | 2.67  |
|                                                      | 7  | Maize                     | 70   | 0.95 | 0.17      | 0.18 | 0.69 | 1.44  |
|                                                      | 8  | Millet                    | 70   | 1.48 | 0.19      | 0.13 | 1.16 | 1.94  |
|                                                      | 9  | Paddy Rice                | 56   | 1.27 | 0.40      | 0.32 | 0.76 | 2.73  |
|                                                      | 10 | Plantains                 | 70   | 1.79 | 0.60      | 0.33 | 1.11 | 4.12  |
|                                                      | 11 | Sorghum                   | 70   | 1.20 | 0.13      | 0.11 | 0.97 | 1.53  |
|                                                      | 12 | Yam                       | 70   | 1.23 | 0.20      | 0.16 | 0.90 | 1.75  |
| <b>Pulses</b>                                        | 13 | Cowpea                    | 70   | 2.06 | 0.35      | 0.17 | 1.45 | 2.84  |
|                                                      | 14 | Soybeans                  | 70   | 1.30 | 0.31      | 0.24 | 0.57 | 2.11  |
| <b>Nuts &amp; seeds</b>                              | 15 | Groundnut                 | 70   | 3.26 | 0.62      | 0.19 | 2.25 | 4.45  |
| <b>Meat, poultry and fish</b>                        | 16 | Anchovies                 | 70   | 6.33 | 1.37      | 0.22 | 3.19 | 11.68 |
|                                                      | 17 | Salted Dried Tilapia Fish | 70   | 2.43 | 0.58      | 0.24 | 0.99 | 4.15  |
|                                                      | 18 | Smoked Herrings           | 70   | 3.15 | 0.70      | 0.22 | 2.01 | 5.45  |
| <b>Eggs</b>                                          | 19 | Eggs                      | 70   | 8.90 | 0.63      | 0.07 | 7.47 | 10.84 |
| <b>Vitamin A-rich vegetables and fruits</b>          | 20 | Mangoes                   | 70   | 0.85 | 0.31      | 0.36 | 0.38 | 1.76  |
| <b>Other vegetables</b>                              | 21 | Garden Eggs               | 70   | 2.29 | 0.59      | 0.26 | 1.20 | 4.14  |
|                                                      | 22 | Large Onions              | 70   | 3.58 | 1.16      | 0.32 | 1.68 | 5.81  |
|                                                      | 23 | Tomatoes                  | 70   | 3.74 | 1.24      | 0.33 | 1.82 | 7.18  |
| <b>Other fruits</b>                                  | 24 | Bananas                   | 70   | 1.69 | 0.33      | 0.20 | 1.02 | 2.53  |
|                                                      | 25 | Oranges                   | 70   | 1.35 | 0.41      | 0.31 | 0.55 | 3.09  |
|                                                      | 26 | Pineapples                | 70   | 1.47 | 0.16      | 0.11 | 1.15 | 1.94  |

Note: Authors' calculations, from Ghana Ministry of Food and Agriculture data. Two food groups in the MDD-W are not represented in this dataset: Dairy, and Dark Green Leafy Vegetables. Kokonte and Gari refer to processed cassava products. Groundnut refers to shelled groundnut, with prices for unshelled groundnut omitted from data analysis.

**Table A2. Descriptive Statistics of Monthly Food Prices per kg – Tanzania (2011\$)**

| <b>Food Group</b>                                    | <b>No</b> | <b>Foodstuff</b>                | <b>Obs.</b> | <b>Mean</b> | <b>Std. Dev.</b> | <b>CV</b> | <b>Min</b> | <b>Max</b> |
|------------------------------------------------------|-----------|---------------------------------|-------------|-------------|------------------|-----------|------------|------------|
| <b>Grains, white roots and tubers, and plantains</b> | 1         | Cassava flour                   | 60          | 2.00        | 0.23             | 0.11      | 1.62       | 2.63       |
|                                                      | 2         | Cassava fresh                   | 60          | 1.23        | 0.11             | 0.09      | 0.95       | 1.43       |
|                                                      | 3         | Cooking Bananas Green           | 60          | 2.00        | 0.11             | 0.05      | 1.77       | 2.32       |
|                                                      | 4         | Finger millet                   | 60          | 2.55        | 0.43             | 0.17      | 1.89       | 3.30       |
|                                                      | 5         | Maize Flour                     | 60          | 1.69        | 0.20             | 0.12      | 1.32       | 2.28       |
|                                                      | 6         | Potatoes – round                | 60          | 1.73        | 0.10             | 0.06      | 1.52       | 2.02       |
|                                                      | 7         | Rice                            | 60          | 2.68        | 0.42             | 0.16      | 2.07       | 3.53       |
|                                                      | 8         | Sweet Potatoes                  | 60          | 1.47        | 0.12             | 0.08      | 1.25       | 1.69       |
|                                                      | 9         | Wheat Flour                     | 60          | 2.24        | 0.14             | 0.06      | 2.03       | 2.57       |
|                                                      | 10        | White Maize                     | 60          | 1.11        | 0.13             | 0.12      | 0.89       | 1.49       |
| <b>Pulses</b>                                        | 11        | Soybeans                        | 60          | 2.90        | 0.11             | 0.04      | 2.65       | 3.10       |
|                                                      | 12        | Lentils                         | 60          | 3.81        | 0.35             | 0.09      | 3.20       | 4.40       |
|                                                      | 13        | Red dry beans                   | 60          | 2.63        | 0.13             | 0.05      | 2.43       | 2.94       |
| <b>Nuts &amp; seeds</b>                              | 14        | Natural Groundnuts              | 60          | 3.72        | 0.31             | 0.08      | 3.28       | 4.44       |
| <b>Dairy</b>                                         | 15        | Fresh cow milk                  | 60          | 1.76        | 0.10             | 0.05      | 1.45       | 1.87       |
|                                                      | 16        | Powdered milk                   | 60          | 39.56       | 1.86             | 0.05      | 34.77      | 43.18      |
| <b>Meat, poultry and fish</b>                        | 17        | Beef sausage                    | 60          | 17.48       | 0.34             | 0.02      | 16.95      | 18.37      |
|                                                      | 18        | Beef with bones                 | 60          | 10.89       | 0.52             | 0.05      | 9.65       | 12.32      |
|                                                      | 19        | Beef without bones              | 60          | 10.89       | 0.40             | 0.04      | 9.87       | 12.30      |
|                                                      | 20        | Dried sardines                  | 60          | 8.99        | 0.70             | 0.08      | 7.68       | 10.37      |
|                                                      | 21        | Goat meat                       | 60          | 10.37       | 0.41             | 0.04      | 9.12       | 11.10      |
|                                                      | 22        | Industrially bred live chicken  | 60          | 13.99       | 0.67             | 0.05      | 11.92      | 14.88      |
|                                                      | 23        | Pork meat                       | 60          | 11.93       | 1.04             | 0.09      | 9.22       | 13.63      |
|                                                      | 24        | Traditionally bred live chicken | 60          | 25.34       | 1.69             | 0.07      | 21.16      | 28.23      |
| <b>Eggs</b>                                          | 25        | Eggs-layers                     | 60          | 12.05       | 0.41             | 0.03      | 11.28      | 12.70      |
|                                                      | 26        | Eggs-traditional                | 60          | 16.89       | 0.99             | 0.06      | 14.73      | 18.11      |
| <b>Dark green leafy vegetables</b>                   | 27        | Mchicha (spinach)               | 60          | 1.72        | 0.17             | 0.10      | 1.46       | 2.05       |
| <b>Vitamin A-rich vegetables and fruits</b>          | 28        | Carrots                         | 60          | 2.89        | 0.28             | 0.10      | 2.46       | 3.72       |
|                                                      | 29        | Mangoes                         | 60          | 2.67        | 0.38             | 0.14      | 1.78       | 3.64       |
|                                                      | 30        | Papaya                          | 60          | 2.42        | 0.22             | 0.09      | 2.03       | 2.86       |

**Table A2 (continued)**

| <b>Food Group</b>       | <b>No</b> | <b>Foodstuff</b>     | <b>Obs.</b> | <b>Mean</b> | <b>Std. Dev.</b> | <b>CV</b> | <b>Min</b> | <b>Max</b> |
|-------------------------|-----------|----------------------|-------------|-------------|------------------|-----------|------------|------------|
| <b>Other vegetables</b> | 31        | Bitter tomatoes      | 60          | 2.22        | 0.12             | 0.05      | 1.96       | 2.68       |
|                         | 32        | Egg plant            | 60          | 2.36        | 0.12             | 0.05      | 2.12       | 2.71       |
|                         | 33        | Cabbages             | 60          | 1.15        | 0.11             | 0.10      | 0.94       | 1.43       |
|                         | 34        | Green peas           | 60          | 20.07       | 1.41             | 0.07      | 16.78      | 23.01      |
|                         | 35        | Green bell pepper    | 60          | 3.29        | 0.18             | 0.06      | 2.96       | 3.83       |
|                         | 36        | Ladies finger (okra) | 60          | 3.72        | 0.25             | 0.07      | 3.29       | 4.37       |
|                         | 37        | Onions               | 60          | 2.57        | 0.31             | 0.12      | 2.08       | 3.54       |
|                         | 38        | Tomatoes red         | 60          | 1.88        | 0.21             | 0.11      | 1.50       | 2.44       |
| <b>Other fruits</b>     | 39        | Apples (Imported)    | 60          | 10.18       | 0.84             | 0.08      | 8.24       | 12.28      |
|                         | 40        | Avocado              | 60          | 3.05        | 0.19             | 0.06      | 2.67       | 3.49       |
|                         | 41        | Coconut mature       | 60          | 8.94        | 0.83             | 0.09      | 7.75       | 11.10      |
|                         | 42        | Lemons               | 60          | 3.41        | 0.59             | 0.17      | 2.39       | 5.22       |
|                         | 43        | Limes                | 60          | 4.69        | 0.86             | 0.18      | 3.60       | 7.07       |
|                         | 44        | Oranges              | 60          | 2.04        | 0.21             | 0.10      | 1.60       | 2.59       |
|                         | 45        | Pineapples           | 60          | 3.33        | 0.33             | 0.10      | 2.77       | 3.99       |
|                         | 46        | Sweet banana         | 60          | 2.98        | 0.25             | 0.08      | 2.41       | 3.48       |

Note: Authors' calculations, from Tanzania Bureau of Statistics data.

**Figure A1. Cost of diet diversity in Ghana per unit of weight, March 2009-December 2014**

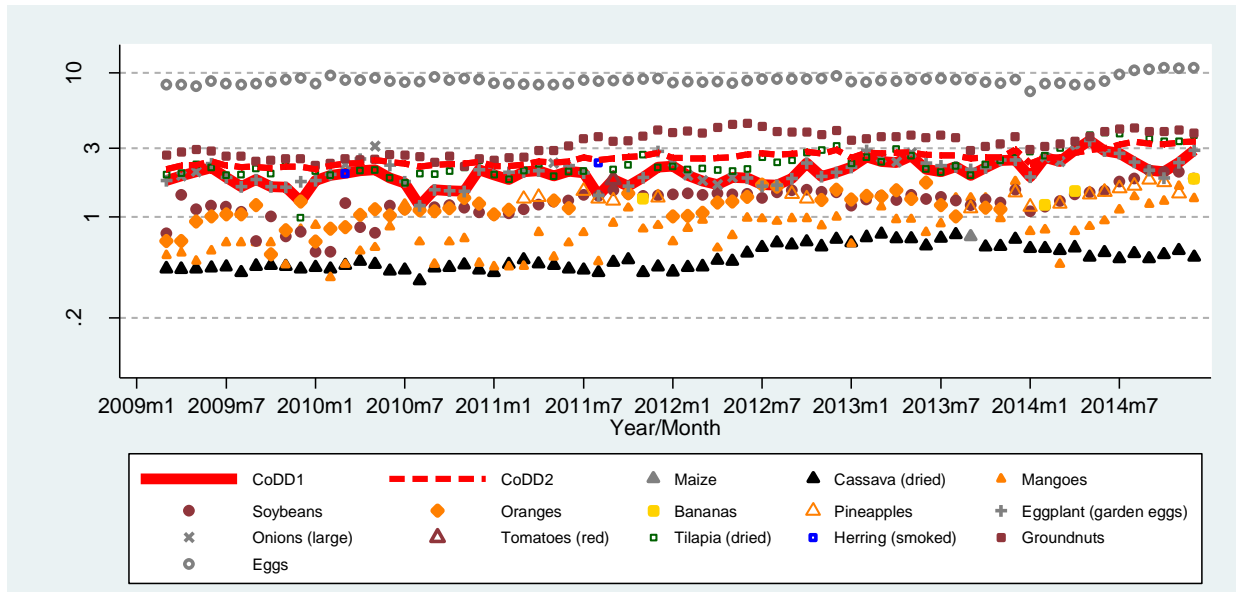

Note: Foods shown are the least-cost item in their food group that month, as defined by the Minimum Dietary Diversity for Women (MDD-W) indicator. Items are ranked in cost per kilogram. CoDD1 is the cost of reaching the 5th group, and CoDD2 is the cost of including all groups. Groups in ascending order of usual cost are starchy staples (cassava & maize), pulses (soybeans), vitamin-A rich fruits and vegetables (mangoes), other fruit (oranges, banana and pineapples), other veg (eggplant, onion, tomatoes), meat/fish (tilapia & herring), nuts/seeds (groundnuts), eggs.

**Figure A2. Cost of diet diversity in Tanzania per unit of weight, January 2011 – December 2015**

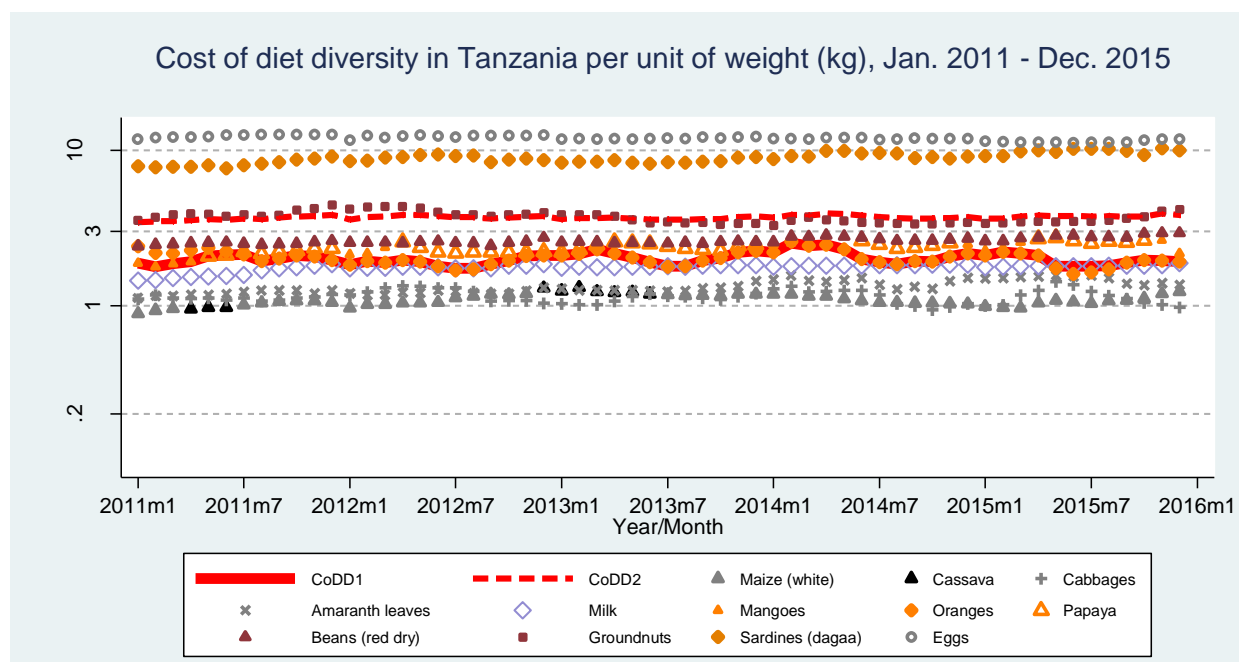

Note: Foods shown are the least-cost item in their food group that month, as defined by the Minimum Dietary Diversity for Women (MDD-W) indicator. Items are ranked in cost per kilogram. CoDD1 is the cost of reaching the 5th group, and CoDD2 is the cost of including all groups. Groups in ascending order of usual cost are starchy staples (cassava & maize), other veg. (cabbage), dark green leafy veg. (amaranth leaves), milk, vitamin-A rich fruits and vegetables (mangoes, papaya), other fruit (oranges), pulses (beans), nuts/seeds (groundnuts), meat/fish (sardines), eggs.

**Figure A3. Cost of Diet Diversity indexes for Ghana and Tanzania, 2009-2015 (January 2011 = 100)**

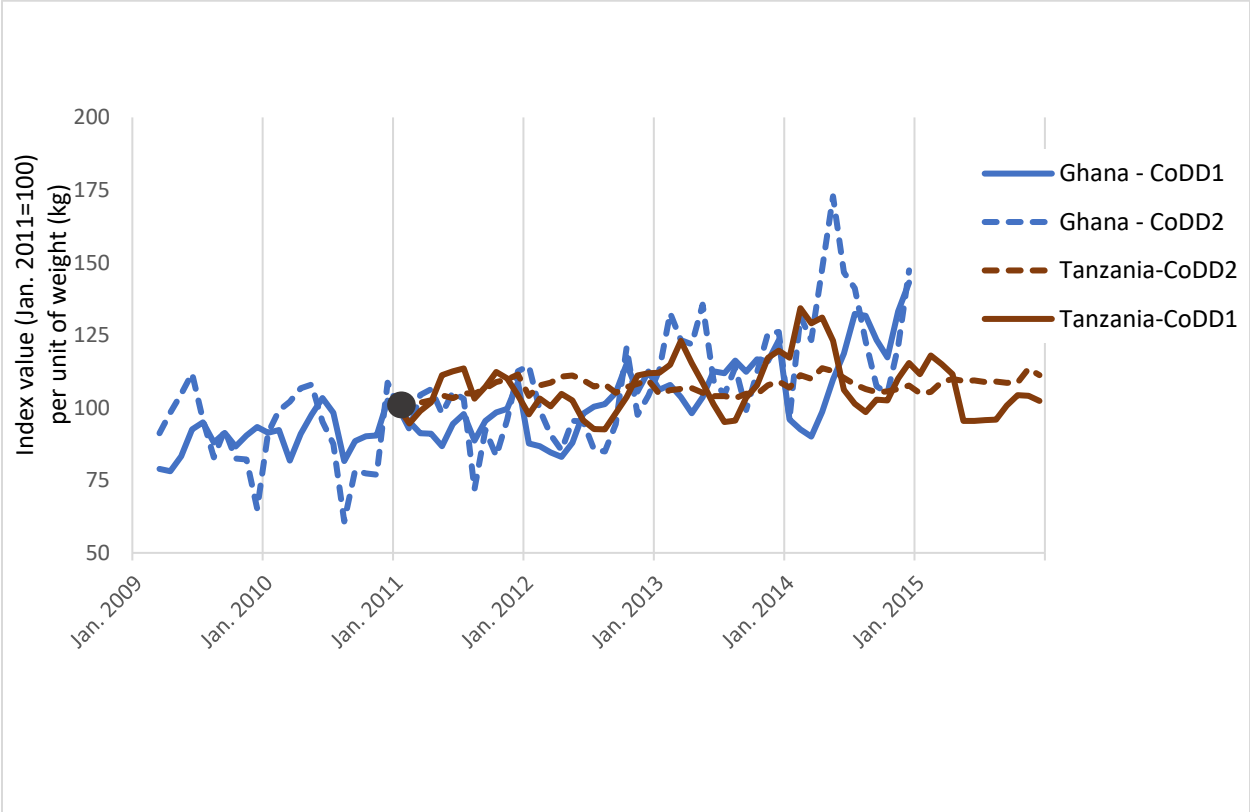

Source: Calculated from Ghana Ministry of Food and Agriculture (MoFA) and Tanzania National Bureau of Statistics (NBS) file data. Index values shown represent changes in the cost of consuming foods from diverse food groups, when using the lowest-priced food in each food group as defined for the Minimum Dietary Diversity for Women (MDD-W) indicator. CoDD1 shows the cost of reaching five food groups, and CoDD2 shows the average cost of including all available groups. Which foods and food groups are included in this minimally diverse diet varies over time and space. Data shown here are relative to January 2011 prices in real USD per kg.

**Figure A4. Cost of Diet Diversity (CoDD) and Cost of Nutrient Adequacy (CoNA) indexes for Ghana and Tanzania, 2009-2015 (January 2011 = 100)**

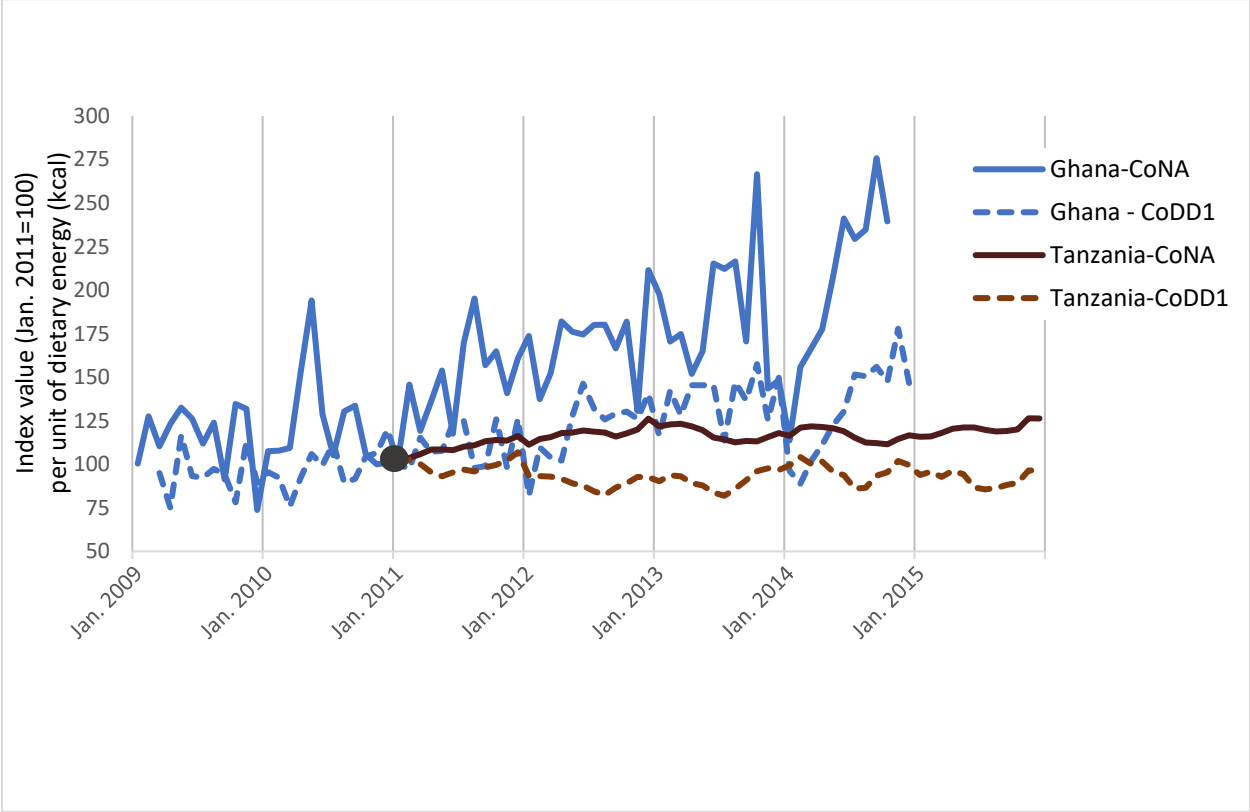

Source: Calculated from Ghana Ministry of Food and Agriculture (MoFA) and Tanzania National Bureau of Statistics (NBS) file data. Index values shown represent changes in the cost of meeting energy needs from diverse food groups (CoDD1) and reaching nutrient adequacy (CoNA). Which foods and food groups are included in the index varies over time and space. Data shown here are relative to Jan. 2011 prices in real USD/kcal.



**Figure A5. The Cost of Nutrient Adequacy (CoNA) in Ghana and Tanzania, 2009-15**

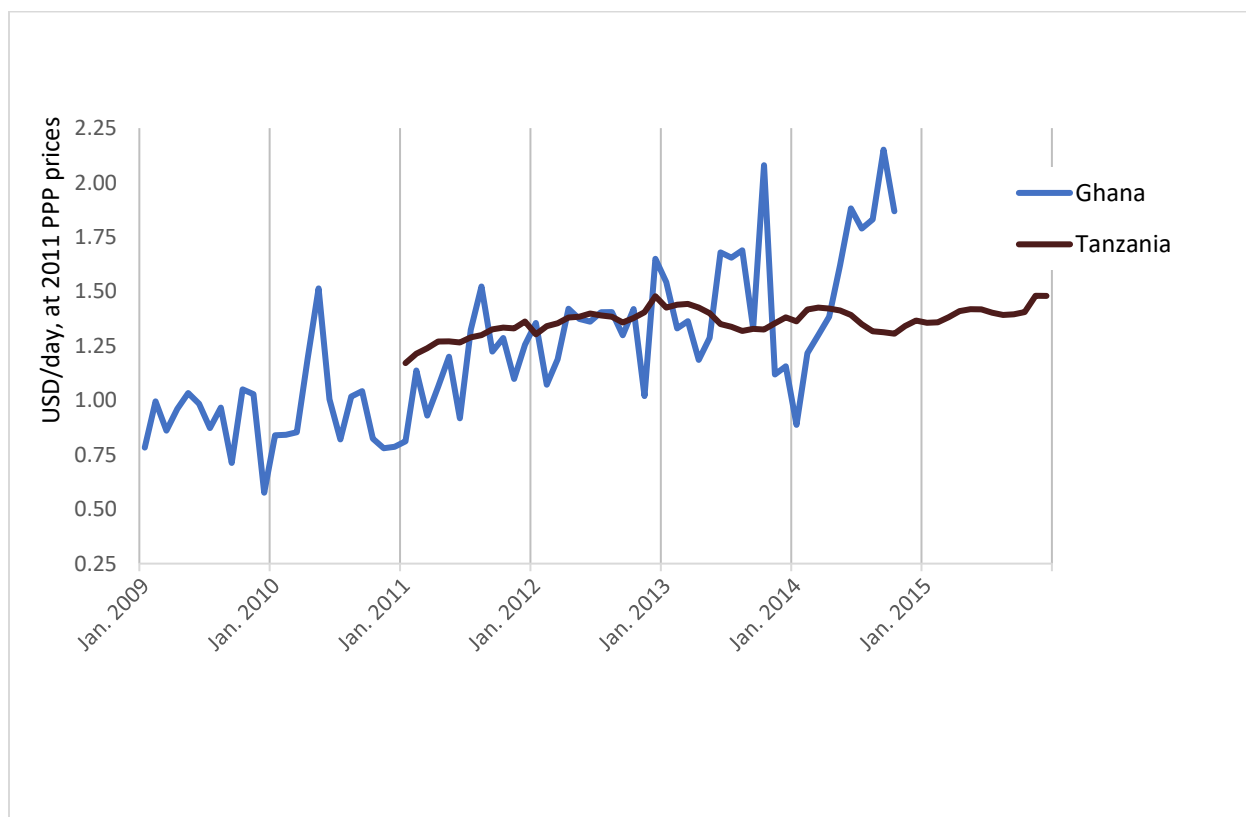

Source: Calculated from Ghana Ministry of Food and Agriculture (MoFA) and Tanzania National Bureau of Statistics (NBS) file data. Index values shown represent the value per day of a least-cost diet, meeting daily needs for dietary energy, protein and 17 micronutrients based on estimated average requirements for an adult woman. Foods included in the least-cost diet vary over time and space, providing a lower bound on the cost of meeting nutrient needs given other goals such as food preferences.

Table A3. Nutritional and Dietary Energy Criteria

| No | Nutrient Groups       | Nutrients            | EARs <sup>1</sup> | Units    |
|----|-----------------------|----------------------|-------------------|----------|
| 1  | <b>Dietary Energy</b> | Energy               | 2,000             | kcal/day |
| 2  | <b>Macronutrient</b>  | Protein <sup>2</sup> | 36.3              | g/day    |
| 3  | <b>Minerals</b>       | Calcium              | 800               | mg/day   |
| 4  |                       | Iron                 | 8.1               | mg/day   |
| 5  |                       | Magnesium            | 255               | mg/day   |
| 6  |                       | Phosphorus           | 580               | mg/day   |
| 7  |                       | Zinc                 | 6.8               | mg/day   |
| 8  |                       | Copper               | 0.7               | mcg/day  |
| 9  |                       | Selenium             | 45                | mcg/day  |
| 10 |                       | <b>Vitamins</b>      | Vitamin C         | 60       |
| 11 | Thiamin               |                      | 0.9               | mg/day   |
| 12 | Riboflavin            |                      | 0.9               | mg/day   |
| 13 | Niacin                |                      | 11                | mg/day   |
| 14 | Vitamin B6            |                      | 1.1               | mg/day   |
| 15 | Folate                |                      | 320               | mg/day   |
| 16 | Vitamin B12           |                      | 2                 | mcg/day  |
| 17 | Vitamin A             |                      | 500               | mcg/day  |
| 18 | Vitamin E             |                      | 12                | mg/day   |

Note: Data shown are estimated Average Requirement (EAR) for adult women from 19 to 30 years old, from Dietary Reference Intakes (DRIs) developed by the U.S. Institute of Medicine of the National Academies. EAR of protein is calculated based on an adult woman of 55kg at a dietary energy level of 2000 kcal/day.

Table A4. Food Items, Food Groups and Food Composition (Ghana)

| Foods                                | Food Groups                                   | Energy | Protein | Calcium | Iron  | Magnesium | Phosphorus | Zinc  | Vitamin C | Thiamin | Riboflavin | Niacin | Vitamin B6 | Folate | Vitamin B12 | Vitamin A | Vitamin E | Copper | Selenium |
|--------------------------------------|-----------------------------------------------|--------|---------|---------|-------|-----------|------------|-------|-----------|---------|------------|--------|------------|--------|-------------|-----------|-----------|--------|----------|
| <b>ANCHOVIES</b>                     | Meat, poultry and fish                        | 1.310  | 0.204   | 1.470   | 0.033 | 0.410     | 1.740      | 0.017 | 0.000     | 0.001   | 0.003      | 0.140  | 0.001      | 0.090  | 0.006       | 0.150     | 0.006     | 0.002  | 0.365    |
| <b>BANANA</b>                        | Other fruits                                  | 0.890  | 0.011   | 0.050   | 0.003 | 0.270     | 0.220      | 0.002 | 0.087     | 0.000   | 0.001      | 0.007  | 0.004      | 0.200  | 0.000       | 0.030     | 0.001     | 0.001  | 0.010    |
| <b>CASSAVA</b>                       | Grains, white roots and tubers, and plantains | 1.600  | 0.014   | 0.160   | 0.003 | 0.210     | 0.270      | 0.003 | 0.206     | 0.001   | 0.000      | 0.009  | 0.001      | 0.270  | 0.000       | 0.010     | 0.002     | 0.001  | 0.007    |
| <b>COCONUT OIL</b>                   | Other oils and fats                           | 8.920  | 0.000   | 0.010   | 0.001 | 0.000     | 0.000      | 0.000 | 0.000     | 0.000   | 0.000      | 0.000  | 0.000      | 0.000  | 0.000       | 0.000     | 0.001     | 0.000  | 0.000    |
| <b>COCOYAM</b>                       | Grains, white roots and tubers, and plantains | 1.120  | 0.015   | 0.430   | 0.006 | 0.330     | 0.840      | 0.002 | 0.045     | 0.001   | 0.000      | 0.006  | 0.003      | 0.220  | 0.000       | 0.040     | 0.024     | 0.002  | 0.007    |
| <b>COWPEA</b>                        | Pulses                                        | 3.360  | 0.235   | 1.100   | 0.083 | 1.840     | 4.240      | 0.034 | 0.015     | 0.009   | 0.002      | 0.021  | 0.004      | 6.330  | 0.000       | 0.030     | 0.004     | 0.008  | 0.090    |
| <b>DRIED CASSAVA CHIPS (KOKONTE)</b> | Grains, white roots and tubers, and plantains | 3.350  | 0.019   | 1.380   | 0.015 | 0.450     | 1.020      | 0.007 | 0.040     | 0.001   | 0.001      | 0.012  | 0.002      | 0.470  | 0.000       | 0.000     | 0.004     | 0.002  | 0.000    |
| <b>EGGS</b>                          | Eggs                                          | 1.430  | 0.126   | 0.560   | 0.018 | 0.120     | 1.980      | 0.013 | 0.000     | 0.000   | 0.005      | 0.001  | 0.002      | 0.470  | 0.009       | 1.600     | 0.011     | 0.001  | 0.307    |
| <b>GARDEN EGGS</b>                   | Other vegetables                              | 0.250  | 0.010   | 0.090   | 0.002 | 0.140     | 0.240      | 0.002 | 0.022     | 0.000   | 0.000      | 0.006  | 0.001      | 0.220  | 0.000       | 0.010     | 0.003     | 0.001  | 0.003    |
| <b>GARI</b>                          | Grains, white roots and tubers, and plantains | 3.350  | 0.019   | 1.380   | 0.015 | 0.450     | 1.020      | 0.007 | 0.040     | 0.001   | 0.001      | 0.012  | 0.002      | 0.470  | 0.000       | 0.000     | 0.004     | 0.002  | 0.000    |
| <b>GROUNDNUT</b>                     | Nuts and seeds                                | 5.670  | 0.258   | 0.920   | 0.046 | 1.680     | 3.760      | 0.033 | 0.000     | 0.006   | 0.001      | 0.121  | 0.003      | 2.400  | 0.000       | 0.000     | 0.083     | 0.011  | 0.072    |
| <b>GROUNDNUT OIL</b>                 | Other oils and fats                           | 8.840  | 0.000   | 0.000   | 0.000 | 0.000     | 0.000      | 0.000 | 0.000     | 0.000   | 0.000      | 0.000  | 0.000      | 0.000  | 0.000       | 0.000     | 0.157     | 0.000  | 0.000    |
| <b>IMPORTED RICE</b>                 | Grains, white roots and tubers, and plantains | 3.650  | 0.071   | 0.280   | 0.008 | 0.250     | 1.150      | 0.011 | 0.000     | 0.001   | 0.000      | 0.016  | 0.002      | 0.080  | 0.000       | 0.000     | 0.001     | 0.002  | 0.151    |

Table A4 (continued)

| Foods               | Food Groups                                   | Energy | Protein | Calcium | Iron  | Magnesium | Phosphorus | Zinc  | Vitamin C | Thiamin | Riboflavin | Niacin | Vitamin B6 | Folate | Vitamin B12 | Vitamin A | Vitamin E | Copper | Selenium |
|---------------------|-----------------------------------------------|--------|---------|---------|-------|-----------|------------|-------|-----------|---------|------------|--------|------------|--------|-------------|-----------|-----------|--------|----------|
| <b>LARGE ONIONS</b> | Other vegetables                              | 0.400  | 0.011   | 0.230   | 0.002 | 0.100     | 0.290      | 0.002 | 0.074     | 0.000   | 0.000      | 0.001  | 0.001      | 0.190  | 0.000       | 0.000     | 0.000     | 0.000  | 0.005    |
| <b>LOCAL RICE</b>   | Grains, white roots and tubers, and plantains | 3.580  | 0.065   | 0.030   | 0.008 | 0.230     | 0.950      | 0.011 | 0.000     | 0.001   | 0.000      | 0.016  | 0.002      | 0.060  | 0.000       | 0.000     | 0.000     | 0.002  | 0.000    |
| <b>MAIZE</b>        | Grains, white roots and tubers, and plantains | 3.650  | 0.094   | 0.070   | 0.027 | 1.270     | 2.100      | 0.022 | 0.000     | 0.004   | 0.002      | 0.036  | 0.006      | 0.190  | 0.000       | 0.110     | 0.005     | 0.003  | 0.155    |
| <b>MANGOES</b>      | Vitamin A-rich vegetables and fruits          | 0.000  | 0.000   | 0.000   | 0.000 | 0.000     | 0.000      | 0.000 | 0.000     | 0.000   | 0.000      | 0.000  | 0.000      | 0.000  | 0.000       | 0.000     | 0.000     | 0.000  | 0.000    |
| <b>MILLET</b>       | Grains, white roots and tubers, and plantains | 3.780  | 0.110   | 0.080   | 0.030 | 1.140     | 2.850      | 0.017 | 0.000     | 0.004   | 0.003      | 0.047  | 0.004      | 0.850  | 0.000       | 0.000     | 0.001     | 0.008  | 0.027    |
| <b>ORANGES</b>      | Other fruits                                  | 0.460  | 0.007   | 0.430   | 0.001 | 0.100     | 0.120      | 0.001 | 0.450     | 0.001   | 0.000      | 0.004  | 0.001      | 0.170  | 0.000       | 0.110     | 0.002     | 0.000  | 0.005    |
| <b>PADDY RICE</b>   | Grains, white roots and tubers, and plantains | 0.000  | 0.000   | 0.000   | 0.000 | 0.000     | 0.000      | 0.000 | 0.000     | 0.000   | 0.000      | 0.000  | 0.000      | 0.000  | 0.000       | 0.000     | 0.000     | 0.000  | 0.000    |
| <b>PALM OIL</b>     | Other oils and fats                           | 8.840  | 0.000   | 0.000   | 0.000 | 0.000     | 0.000      | 0.000 | 0.000     | 0.000   | 0.000      | 0.000  | 0.000      | 0.000  | 0.000       | 0.000     | 0.159     | 0.000  | 0.000    |
| <b>PINEAPPLE</b>    | Other fruits                                  | 0.500  | 0.005   | 0.130   | 0.003 | 0.120     | 0.080      | 0.001 | 0.478     | 0.001   | 0.000      | 0.005  | 0.001      | 0.180  | 0.000       | 0.030     | 0.000     | 0.001  | 0.001    |
| <b>PLANTAIN</b>     | Grains, white roots and tubers, and plantains | 1.220  | 0.013   | 0.030   | 0.006 | 0.370     | 0.340      | 0.001 | 0.184     | 0.001   | 0.001      | 0.007  | 0.003      | 0.220  | 0.000       | 0.560     | 0.001     | 0.001  | 0.015    |

Table A4 (continued)

| Foods                            | Food Groups                                   | Energy | Protein | Calcium | Iron  | Magnesium | Phosphorus | Zinc  | Vitamin C | Thiamin | Riboflavin | Niacin | Vitamin B6 | Folate | Vitamin B12 | Vitamin A | Vitamin E | Copper | Selenium |
|----------------------------------|-----------------------------------------------|--------|---------|---------|-------|-----------|------------|-------|-----------|---------|------------|--------|------------|--------|-------------|-----------|-----------|--------|----------|
| <b>SALTED DRIED TILAPIA FISH</b> | Meat, poultry and fish                        | 0.960  | 0.201   | 0.100   | 0.006 | 0.270     | 1.700      | 0.003 | 0.000     | 0.000   | 0.001      | 0.039  | 0.002      | 0.240  | 0.016       | 0.000     | 0.004     | 0.001  | 0.418    |
| <b>SMOKED HERRINGS</b>           | Meat, poultry and fish                        | 1.580  | 0.180   | 0.570   | 0.011 | 0.320     | 2.360      | 0.010 | 0.007     | 0.001   | 0.002      | 0.032  | 0.003      | 0.100  | 0.137       | 0.280     | 0.011     | 0.001  | 0.365    |
| <b>SORGHUM</b>                   | Grains, white roots and tubers, and plantains | 3.290  | 0.106   | 0.130   | 0.034 | 1.650     | 2.890      | 0.017 | 0.000     | 0.003   | 0.001      | 0.037  | 0.004      | 0.200  | 0.000       | 0.000     | 0.005     | 0.003  | 0.122    |
| <b>SOYBEANS</b>                  | Pulses                                        | 0.000  | 0.000   | 0.000   | 0.000 | 0.000     | 0.000      | 0.000 | 0.000     | 0.000   | 0.000      | 0.000  | 0.000      | 0.000  | 0.000       | 0.000     | 0.000     | 0.000  | 0.000    |
| <b>TOMATOES</b>                  | Other vegetables                              | 0.180  | 0.009   | 0.100   | 0.003 | 0.110     | 0.240      | 0.002 | 0.137     | 0.000   | 0.000      | 0.006  | 0.001      | 0.150  | 0.000       | 0.420     | 0.005     | 0.001  | 0.000    |
| <b>YAM</b>                       | Grains, white roots and tubers, and plantains | 1.180  | 0.015   | 0.170   | 0.005 | 0.210     | 0.550      | 0.002 | 0.171     | 0.001   | 0.000      | 0.006  | 0.003      | 0.230  | 0.000       | 0.070     | 0.004     | 0.002  | 0.007    |

Note: Food groups apply the definition of MDD-W. Food composition data sources include National Nutrient Database for Standard Reference (USDA) and FAO's West African Food Composition Table. Data shown are nutrients contents per gram of food items. Unit is kcal for dietary energy, g for protein, mg for calcium, iron, magnesium, phosphorus, zinc, vitamin C, thiamin, riboflavin, niacin, vitamin B6, folate, and vitamin E; and mcg for vitamin B12, vitamin A, copper and selenium.

Table A5. Food Items, Food Groups and Food Compositions (Tanzania)

| Foods                                  | Food Groups                                   | Energy | Protein | Calcium | Iron  | Magnesium | Phosphorus | Zinc  | Vitamin C | Thiamin | Riboflavin | Niacin | Vitamin B6 | Folate | Vitamin B12 | Vitamin A | Vitamin E | Copper | Selenium |
|----------------------------------------|-----------------------------------------------|--------|---------|---------|-------|-----------|------------|-------|-----------|---------|------------|--------|------------|--------|-------------|-----------|-----------|--------|----------|
| <b>APPLES (IMPORTED)</b>               | Other fruits                                  | 0.520  | 0.003   | 0.060   | 0.001 | 0.050     | 0.110      | 0.000 | 0.046     | 0.000   | 0.000      | 0.001  | 0.000      | 0.030  | 0.000       | 0.030     | 0.002     | 0.000  | 0.000    |
| <b>AVOCADO</b>                         | Other fruits                                  | 1.600  | 0.020   | 0.120   | 0.006 | 0.290     | 0.520      | 0.006 | 0.100     | 0.001   | 0.001      | 0.017  | 0.003      | 0.810  | 0.000       | 0.070     | 0.021     | 0.002  | 0.004    |
| <b>SOYBEANS (BLANKETI)</b>             | Pulses                                        | 4.460  | 0.365   | 2.770   | 0.157 | 2.800     | 7.040      | 0.049 | 0.060     | 0.009   | 0.009      | 0.016  | 0.004      | 3.750  | 0.000       | 0.010     | 0.009     | 0.017  | 0.178    |
| <b>BEEF SAUSAGE</b>                    | Meat, poultry and fish                        | 4.050  | 0.155   | 0.150   | 0.015 | 0.130     | 1.850      | 0.029 | 0.007     | 0.000   | 0.001      | 0.032  | 0.002      | 0.050  | 0.020       | 0.250     | 0.005     | 0.001  | 0.000    |
| <b>BEEF WITHOUT BONES (STEAK)</b>      | Meat, poultry and fish                        | 2.780  | 0.175   | 0.080   | 0.019 | 0.170     | 1.560      | 0.036 | 0.000     | 0.001   | 0.002      | 0.035  | 0.003      | 0.070  | 0.027       | 0.000     | 0.000     | 0.001  | 0.159    |
| <b>BITTER TOMATOES (NYANYA CHUNGU)</b> | Other vegetables                              | 0.250  | 0.010   | 0.090   | 0.002 | 0.140     | 0.240      | 0.002 | 0.022     | 0.000   | 0.000      | 0.006  | 0.001      | 0.220  | 0.000       | 0.010     | 0.003     | 0.001  | 0.003    |
| <b>BRINJALS/EGG PLANT (BILINGANYA)</b> | Other vegetables                              | 0.250  | 0.010   | 0.090   | 0.002 | 0.140     | 0.240      | 0.002 | 0.022     | 0.000   | 0.000      | 0.006  | 0.001      | 0.220  | 0.000       | 0.010     | 0.003     | 0.001  | 0.003    |
| <b>CABBAGES</b>                        | Other vegetables                              | 0.410  | 0.009   | 0.330   | 0.003 | 0.120     | 0.350      | 0.002 | 0.059     | 0.001   | 0.001      | 0.010  | 0.001      | 0.190  | 0.000       | 8.350     | 0.007     | 0.000  | 0.001    |
| <b>CARROTS</b>                         | Vitamin A-rich vegetables and fruits          | 0.410  | 0.009   | 0.330   | 0.003 | 0.120     | 0.350      | 0.002 | 0.059     | 0.001   | 0.001      | 0.010  | 0.001      | 0.190  | 0.000       | 8.350     | 0.007     | 0.000  | 0.001    |
| <b>CASSAVA FLOUR</b>                   | Grains, white roots and tubers, and plantains | 3.350  | 0.019   | 1.380   | 0.015 | 0.450     | 1.020      | 0.007 | 0.040     | 0.001   | 0.001      | 0.012  | 0.002      | 0.470  | 0.000       | 0.000     | 0.004     | 0.002  | 0.000    |
| <b>CASSAVA FRESH</b>                   | Grains, white roots and tubers, and plantains | 1.600  | 0.014   | 0.160   | 0.003 | 0.210     | 0.270      | 0.003 | 0.206     | 0.001   | 0.000      | 0.009  | 0.001      | 0.270  | 0.000       | 0.010     | 0.002     | 0.001  | 0.007    |
| <b>COCONUT MATURE (ISYOVUNJWA)</b>     | Other fruits                                  | 1.620  | 0.016   | 0.190   | 0.022 | 0.170     | 1.110      | 0.004 | 0.020     | 0.001   | 0.001      | 0.006  | 0.000      | 0.120  | 0.000       | 0.000     | 0.003     | 0.002  | 0.000    |

Table A5 (continued)

| Foods                                              | Food Groups                                   | Energy | Protein | Calcium | Iron  | Magnesium | Phosphorus | Zinc  | Vitamin C | Thiamin | Riboflavin | Niacin | Vitamin B6 | Folate | Vitamin B12 | Vitamin A | Vitamin E | Copper | Selenium |
|----------------------------------------------------|-----------------------------------------------|--------|---------|---------|-------|-----------|------------|-------|-----------|---------|------------|--------|------------|--------|-------------|-----------|-----------|--------|----------|
| <b>COOKING BANANA GREEN</b>                        | Grains, white roots and tubers, and plantains | 1.220  | 0.013   | 0.030   | 0.006 | 0.370     | 0.340      | 0.001 | 0.184     | 0.001   | 0.001      | 0.007  | 0.003      | 0.220  | 0.000       | 0.560     | 0.001     | 0.001  | 0.015    |
| <b>COOKING FAT</b>                                 | Other oils and fats                           | 7.170  | 0.009   | 0.240   | 0.000 | 0.020     | 0.240      | 0.001 | 0.000     | 0.000   | 0.000      | 0.000  | 0.000      | 0.030  | 0.002       | 6.840     | 0.023     | 0.000  | 0.010    |
| <b>COOKING OIL VARIETY</b>                         | Other oils and fats                           | 8.840  | 0.000   | 0.000   | 0.000 | 0.000     | 0.000      | 0.000 | 0.000     | 0.000   | 0.000      | 0.000  | 0.000      | 0.000  | 0.000       | 0.000     | 0.382     | 0.000  | 0.000    |
| <b>DRIED SARDINES (DAGAA)</b>                      | Meat, poultry and fish                        | 1.500  | 0.280   | 1.030   | 0.023 | 0.460     | 3.670      | 0.023 | 0.000     | 0.000   | 0.002      | 0.109  | 0.013      | 0.050  | 0.143       | 0.250     | 0.011     | 0.001  | 0.000    |
| <b>FINGER MILLET GRAINS (PUNJE ZA ULEZI)</b>       | Grains, white roots and tubers, and plantains | 3.780  | 0.110   | 0.080   | 0.030 | 1.140     | 2.850      | 0.017 | 0.000     | 0.004   | 0.003      | 0.047  | 0.004      | 0.850  | 0.000       | 0.000     | 0.001     | 0.008  | 0.027    |
| <b>FRESH COW MILK</b>                              | Dairy                                         | 0.610  | 0.032   | 1.130   | 0.000 | 0.100     | 0.840      | 0.004 | 0.000     | 0.000   | 0.002      | 0.001  | 0.000      | 0.050  | 0.005       | 0.460     | 0.001     | 0.000  | 0.037    |
| <b>GOAT MEAT</b>                                   | Meat, poultry and fish                        | 1.090  | 0.206   | 0.130   | 0.028 | 0.000     | 1.800      | 0.040 | 0.000     | 0.001   | 0.005      | 0.038  | 0.000      | 0.050  | 0.011       | 0.000     | 0.000     | 0.003  | 0.088    |
| <b>GREEN PEAS (NIEGERE - ZILIZOMENYWA)</b>         | Pulses                                        | 0.420  | 0.028   | 0.430   | 0.021 | 0.240     | 0.530      | 0.003 | 0.600     | 0.002   | 0.001      | 0.006  | 0.002      | 0.420  | 0.000       | 0.540     | 0.004     | 0.001  | 0.007    |
| <b>GREEN PEPPER (HOHO)</b>                         | Other vegetables                              | 0.200  | 0.009   | 0.100   | 0.003 | 0.100     | 0.200      | 0.001 | 0.804     | 0.001   | 0.000      | 0.005  | 0.002      | 0.100  | 0.000       | 0.180     | 0.004     | 0.001  | 0.000    |
| <b>INDUSTRIALLY BRED LIVE CHICKEN - (BROILERS)</b> | Meat, poultry and fish                        | 2.130  | 0.183   | 0.110   | 0.013 | 0.200     | 1.490      | 0.015 | 0.026     | 0.001   | 0.002      | 0.066  | 0.003      | 0.300  | 0.011       | 2.320     | 0.000     | 0.001  | 0.118    |
| <b>LADIES FINGER/OKRA (BAMIA)</b>                  | Other vegetables                              | 0.330  | 0.019   | 0.820   | 0.006 | 0.570     | 0.610      | 0.006 | 0.230     | 0.002   | 0.001      | 0.010  | 0.002      | 0.600  | 0.000       | 0.360     | 0.003     | 0.001  | 0.007    |
| <b>LEMONS</b>                                      | Other fruits                                  | 0.290  | 0.011   | 0.260   | 0.006 | 0.080     | 0.160      | 0.001 | 0.530     | 0.000   | 0.000      | 0.001  | 0.001      | 0.110  | 0.000       | 0.010     | 0.002     | 0.000  | 0.004    |

Table A5 (continued)

| Foods                                  | Food Groups                                   | Energy | Protein | Calcium | Iron  | Magnesium | Phosphorus | Zinc  | Vitamin C | Thiamin | Riboflavin | Niacin | Vitamin B6 | Folate | Vitamin B12 | Vitamin A | Vitamin E | Copper | Selenium |
|----------------------------------------|-----------------------------------------------|--------|---------|---------|-------|-----------|------------|-------|-----------|---------|------------|--------|------------|--------|-------------|-----------|-----------|--------|----------|
| <b>LENTILS (CHOROKO)</b>               | Pulses                                        | 2.970  | 0.254   | 0.610   | 0.070 | 1.030     | 3.910      | 0.039 | 0.000     | 0.006   | 0.002      | 0.023  | 0.007      | 2.950  | 0.000       | 0.030     | 0.005     | 0.007  | 0.000    |
| <b>LIMES</b>                           | Other fruits                                  | 0.300  | 0.007   | 0.330   | 0.006 | 0.060     | 0.180      | 0.001 | 0.291     | 0.000   | 0.000      | 0.002  | 0.000      | 0.080  | 0.000       | 0.020     | 0.002     | 0.001  | 0.004    |
| <b>MAIZE FLOUR (WHITE)</b>             | Grains, white roots and tubers, and plantains | 3.610  | 0.069   | 0.070   | 0.024 | 0.930     | 2.720      | 0.017 | 0.000     | 0.002   | 0.001      | 0.019  | 0.004      | 0.250  | 0.000       | 0.000     | 0.004     | 0.002  | 0.154    |
| <b>MANGOES</b>                         | Vitamin A-rich fruits and vegetables          | 0.600  | 0.008   | 0.110   | 0.002 | 0.100     | 0.140      | 0.001 | 0.364     | 0.000   | 0.000      | 0.007  | 0.001      | 0.430  | 0.000       | 0.540     | 0.009     | 0.001  | 0.006    |
| <b>MARGARINE</b>                       | Other oils and fats                           | 7.190  | 0.009   | 0.300   | 0.000 | 0.030     | 0.230      | 0.000 | 0.002     | 0.000   | 0.000      | 0.000  | 0.000      | 0.010  | 0.001       | 8.190     | 0.031     | 0.000  | 0.000    |
| <b>MCHICHA (SPINACH)</b>               | Dark green leafy vegetables                   | 0.230  | 0.029   | 0.990   | 0.027 | 0.790     | 0.490      | 0.005 | 0.281     | 0.001   | 0.002      | 0.007  | 0.002      | 1.940  | 0.000       | 4.690     | 0.020     | 0.001  | 0.010    |
| <b>NATURAL GROUNDNUTS (UN ROASTED)</b> | Nuts and seeds                                | 5.670  | 0.258   | 0.920   | 0.046 | 1.680     | 3.760      | 0.033 | 0.000     | 0.006   | 0.001      | 0.121  | 0.003      | 2.400  | 0.000       | 0.000     | 0.083     | 0.011  | 0.072    |
| <b>ONE EGG LAYERS</b>                  | Eggs                                          | 1.430  | 0.126   | 0.560   | 0.018 | 0.120     | 1.980      | 0.013 | 0.000     | 0.000   | 0.005      | 0.001  | 0.002      | 0.470  | 0.009       | 1.600     | 0.011     | 0.001  | 0.307    |
| <b>ONE EGG TRADITIONAL</b>             | Eggs                                          | 1.430  | 0.126   | 0.560   | 0.018 | 0.120     | 1.980      | 0.013 | 0.000     | 0.000   | 0.005      | 0.001  | 0.002      | 0.470  | 0.009       | 1.600     | 0.011     | 0.001  | 0.307    |
| <b>ORANGES</b>                         | Other fruits                                  | 0.460  | 0.007   | 0.430   | 0.001 | 0.100     | 0.120      | 0.001 | 0.450     | 0.001   | 0.000      | 0.004  | 0.001      | 0.170  | 0.000       | 0.110     | 0.002     | 0.000  | 0.005    |
| <b>PAPAYA – PAWPAW</b>                 | Vitamin A-rich fruits and vegetables          | 0.430  | 0.005   | 0.200   | 0.003 | 0.210     | 0.100      | 0.001 | 0.609     | 0.000   | 0.000      | 0.004  | 0.000      | 0.370  | 0.000       | 0.470     | 0.003     | 0.000  | 0.006    |
| <b>PINEAPPLES</b>                      | Other fruits                                  | 0.500  | 0.005   | 0.130   | 0.003 | 0.120     | 0.080      | 0.001 | 0.478     | 0.001   | 0.000      | 0.005  | 0.001      | 0.180  | 0.000       | 0.030     | 0.000     | 0.001  | 0.001    |
| <b>PORK MEAT</b>                       | Meat, poultry and fish                        | 3.760  | 0.139   | 0.190   | 0.007 | 0.130     | 1.550      | 0.016 | 0.004     | 0.006   | 0.002      | 0.038  | 0.003      | 0.040  | 0.006       | 0.020     | 0.003     | 0.001  | 0.284    |



Table A5 (continued)

| Foods                                                     | Food Groups                                   | Energy | Protein | Calcium | Iron  | Magnesium | Phosphorus | Zinc  | Vit C | Thiamin | Riboflavin | Niacin | Vit B6 | Folate | Vit B12 | Vit A | Vit E | Copper | Selenium |
|-----------------------------------------------------------|-----------------------------------------------|--------|---------|---------|-------|-----------|------------|-------|-------|---------|------------|--------|--------|--------|---------|-------|-------|--------|----------|
| <b>POTATOES - ROUND/IRISH</b>                             | Grains, white roots and tubers, and plantains | 0.770  | 0.021   | 0.120   | 0.008 | 0.230     | 0.570      | 0.003 | 0.197 | 0.001   | 0.000      | 0.011  | 0.003  | 0.150  | 0.000   | 0.000 | 0.000 | 0.001  | 0.004    |
| <b>POWDERED MILK</b>                                      | Dairy                                         | 4.950  | 0.259   | 9.680   | 0.007 | 0.910     | 7.350      | 0.035 | 0.113 | 0.003   | 0.013      | 0.007  | 0.003  | 0.390  | 0.033   | 2.280 | 0.005 | 0.001  | 0.000    |
| <b>RED DRY BEANS</b>                                      | Pulses                                        | 3.370  | 0.225   | 0.830   | 0.067 | 1.380     | 4.060      | 0.028 | 0.045 | 0.006   | 0.002      | 0.021  | 0.004  | 3.940  | 0.000   | 0.000 | 0.002 | 0.007  | 0.032    |
| <b>RICE</b>                                               | Grains, white roots and tubers, and plantains | 3.600  | 0.066   | 0.090   | 0.008 | 0.350     | 1.080      | 0.012 | 0.000 | 0.001   | 0.000      | 0.016  | 0.001  | 0.090  | 0.000   | 0.000 | 0.000 | 0.001  | 0.000    |
| <b>ROUND ONIONS</b>                                       | Other vegetables                              | 0.400  | 0.011   | 0.230   | 0.002 | 0.100     | 0.290      | 0.002 | 0.074 | 0.000   | 0.000      | 0.001  | 0.001  | 0.190  | 0.000   | 0.000 | 0.000 | 0.000  | 0.005    |
| <b>SWEET POTATOES</b>                                     | Grains, white roots and tubers, and plantains | 0.860  | 0.016   | 0.300   | 0.006 | 0.250     | 0.470      | 0.003 | 0.024 | 0.001   | 0.001      | 0.006  | 0.002  | 0.110  | 0.000   | 7.090 | 0.003 | 0.002  | 0.006    |
| <b>SWEET BANANA</b>                                       | Other fruits                                  | 0.890  | 0.011   | 0.050   | 0.003 | 0.270     | 0.220      | 0.002 | 0.087 | 0.000   | 0.001      | 0.007  | 0.004  | 0.200  | 0.000   | 0.030 | 0.001 | 0.001  | 0.010    |
| <b>TOMATOES RED</b>                                       | Other vegetables                              | 0.180  | 0.009   | 0.100   | 0.003 | 0.110     | 0.240      | 0.002 | 0.137 | 0.000   | 0.000      | 0.006  | 0.001  | 0.150  | 0.000   | 0.420 | 0.005 | 0.001  | 0.000    |
| <b>TRADITIONALLY BRED LIVE CHICKEN (KUKU WA KIENYEJI)</b> | Meat, poultry and fish                        | 2.130  | 0.183   | 0.110   | 0.013 | 0.200     | 1.490      | 0.015 | 0.026 | 0.001   | 0.002      | 0.066  | 0.003  | 0.300  | 0.011   | 2.320 | 0.000 | 0.001  | 0.118    |
| <b>WHEAT FLOUR</b>                                        | Grains, white roots and tubers, and plantains | 3.640  | 0.103   | 0.150   | 0.012 | 0.220     | 1.080      | 0.007 | 0.000 | 0.001   | 0.000      | 0.013  | 0.000  | 0.260  | 0.000   | 0.000 | 0.001 | 0.001  | 0.339    |
| <b>WHITE MAIZE GRAINS</b>                                 | Grains, white roots and tubers, and plantains | 3.650  | 0.094   | 0.070   | 0.027 | 1.270     | 2.100      | 0.022 | 0.000 | 0.004   | 0.002      | 0.036  | 0.006  | 0.000  | 0.000   | 0.000 | 0.000 | 0.003  | 0.155    |

Note: Food groups apply the definition of MDD-W. Food composition data sources include National Nutrient Database for Standard Reference (USDA) and FAO's West African Food Composition Table. Data shown are nutrients contents per gram of food items. Unit is kcal for dietary energy, g for protein, mg for calcium, iron, magnesium, phosphorus, zinc, vitamin C, thiamin, riboflavin, niacin, vitamin B6, folate, and vitamin E; and mcg for vitamin B12, vitamin A, copper and selenium.
